# Supplementary material for: Cytotoxic Marine Alkaloid 3,10-Dibromofascaplysin Induces Apoptosis and Synergizes with Cytarabine Resulting in Leukemia Cell Death
Source: MDPI journal article supplement (doi:10.3390/md19090489), 2021-08-27
Supplement: s1 [file s1]

**Supplementary table 1. List of primers**

|               | PRIMER 1                          | PRIMER 2                    |
|---------------|-----------------------------------|-----------------------------|
| <i>ABL1</i>   | CCTGTCCCAGGTGTATGAGC              | GCTCCTTTTCCACTTCGTCTGA      |
| <i>BCL2</i>   | TGAACTGGGGGAGGATTGTG              | CGTACAGTTCCACAAAGGCA        |
| <i>BCL2L1</i> | GCGTGGAAGCGTAGACAAG               | GTCAGGAACCAGCGGTTGAA        |
| <i>CCNA1</i>  | GCCTCCTGTCTGGTGGA                 | TGCAGTGCATTGCTTCAGAC        |
| <i>CCNB1</i>  | CCTCTCCAAGCCCAATGGAA              | TGGTCTGACTGCTTGCTCTT        |
| <i>CCND1</i>  | TGTCCTACTACCGCCTCACACGCTTCCTCTCCG | TCCTCTTCCTCCTCCTCGGCGGCCTTG |
| <i>CCND2</i>  | GTTCTGCGCTCCAAACTCA               | CTTGATGGAGTTGTCGGTGTAAT     |
| <i>CCNE1</i>  | GGGAGCGGGATGCGA                   | GGGTCTGCACAGACTGCATTA       |
| <i>CDKN1B</i> | GGCTAACTCTGAGGACACGC              | TGGGGAACCGTCTGAAACAT        |
| <i>CTNNB1</i> | AAAATGGCAGTGCGTTTAG               | TTTGAAGGCAGTCTGTCTGA        |
| <i>E2F1</i>   | TGACCCAGGACCTCCGACAG              | GCCTTGTTTGCTCTTAAGGGAGAT    |
| <i>FLT3</i>   | GTGCTTTGCGATTACAGGG               | GCACCTTATGTCCGTCCCAA        |
| <i>GAPDH</i>  | GAGCCCGCAGCCTCCCGCT               | GCGCCCAATACGACCAAATC        |
| <i>GSK3B</i>  | GGAATCCAACAAGGGAGCA               | CCGCACTCCTGAGGTGAAAT        |
| <i>HOXA10</i> | AGGTGGACGCTGCGGCTAATCTCTA         | GCCCCTTCCGAGAGCAGCAAAG      |
| <i>KIT</i>    | CATCATGGAGGATGACGAGT              | CGACCATGAGTAAGGAGGAT        |
| <i>MYC</i>    | TGAGGAGACACCGCCAC                 | CAACATCGATTCTTCCTCATCTTC    |
| <i>NFKB</i>   | ACCCGGCTTCAGAATGGCA               | GGTATGGGCCATCTGCTGTT        |
| <i>PDGFRB</i> | CACCGCAACAAACACACCTT              | CAGCATGGGCACATAGTCCA        |
| <i>TP53</i>   | ACCTATGGAACTACTTCCTGAAA           | CTGGCATTCTGGGAGCTTCA        |
| <i>VEGFR2</i> | AGACCGGCTGAAGCTAGGTA              | CGATGCTCACTGTGTGTTGC        |
