# Supplementary material for: Cytotoxic Marine Alkaloid 3,10-Dibromofascaplysin Induces Apoptosis and Synergizes with Cytarabine Resulting in Leukemia Cell Death
Source: MDPI journal article supplement (doi:10.3390/md19090489), 2021-08-27

**Figure S1.**  $^1\text{H}$  NMR spectra of fascaplysin (Fas)

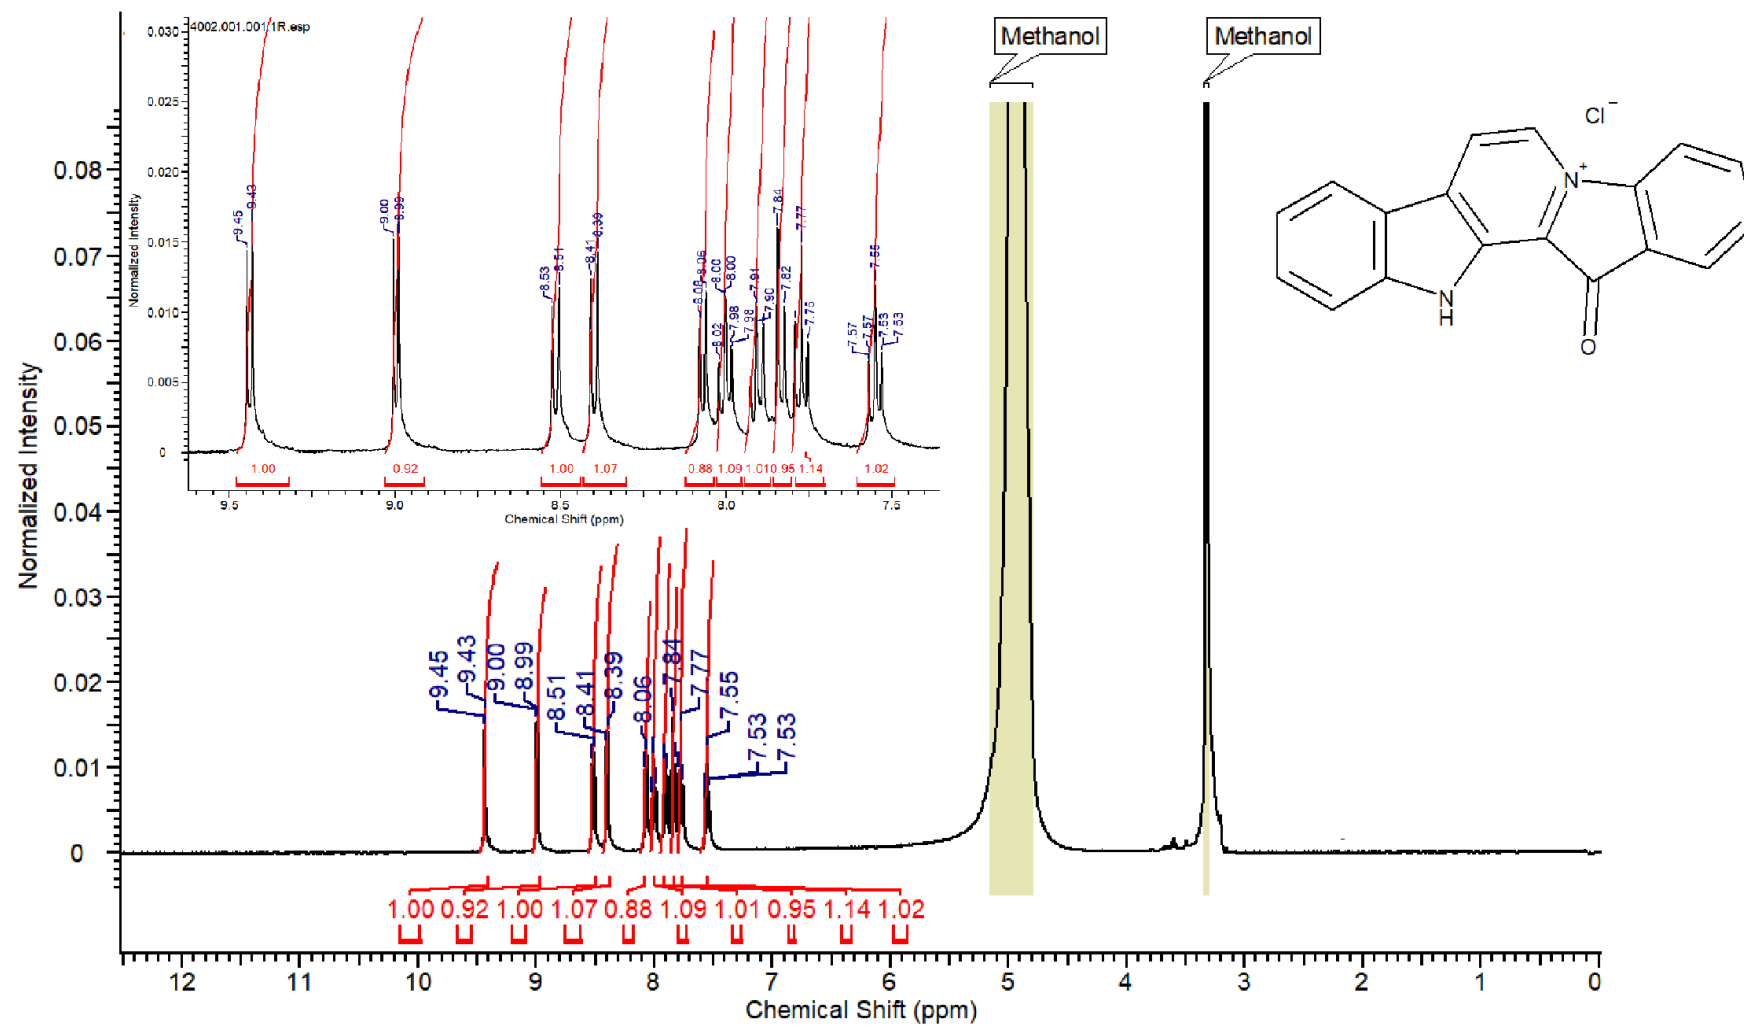

**Figure S2.**  $^1\text{H}$  NMR spectra of 3,10-dibromofascaplysin (DBF)

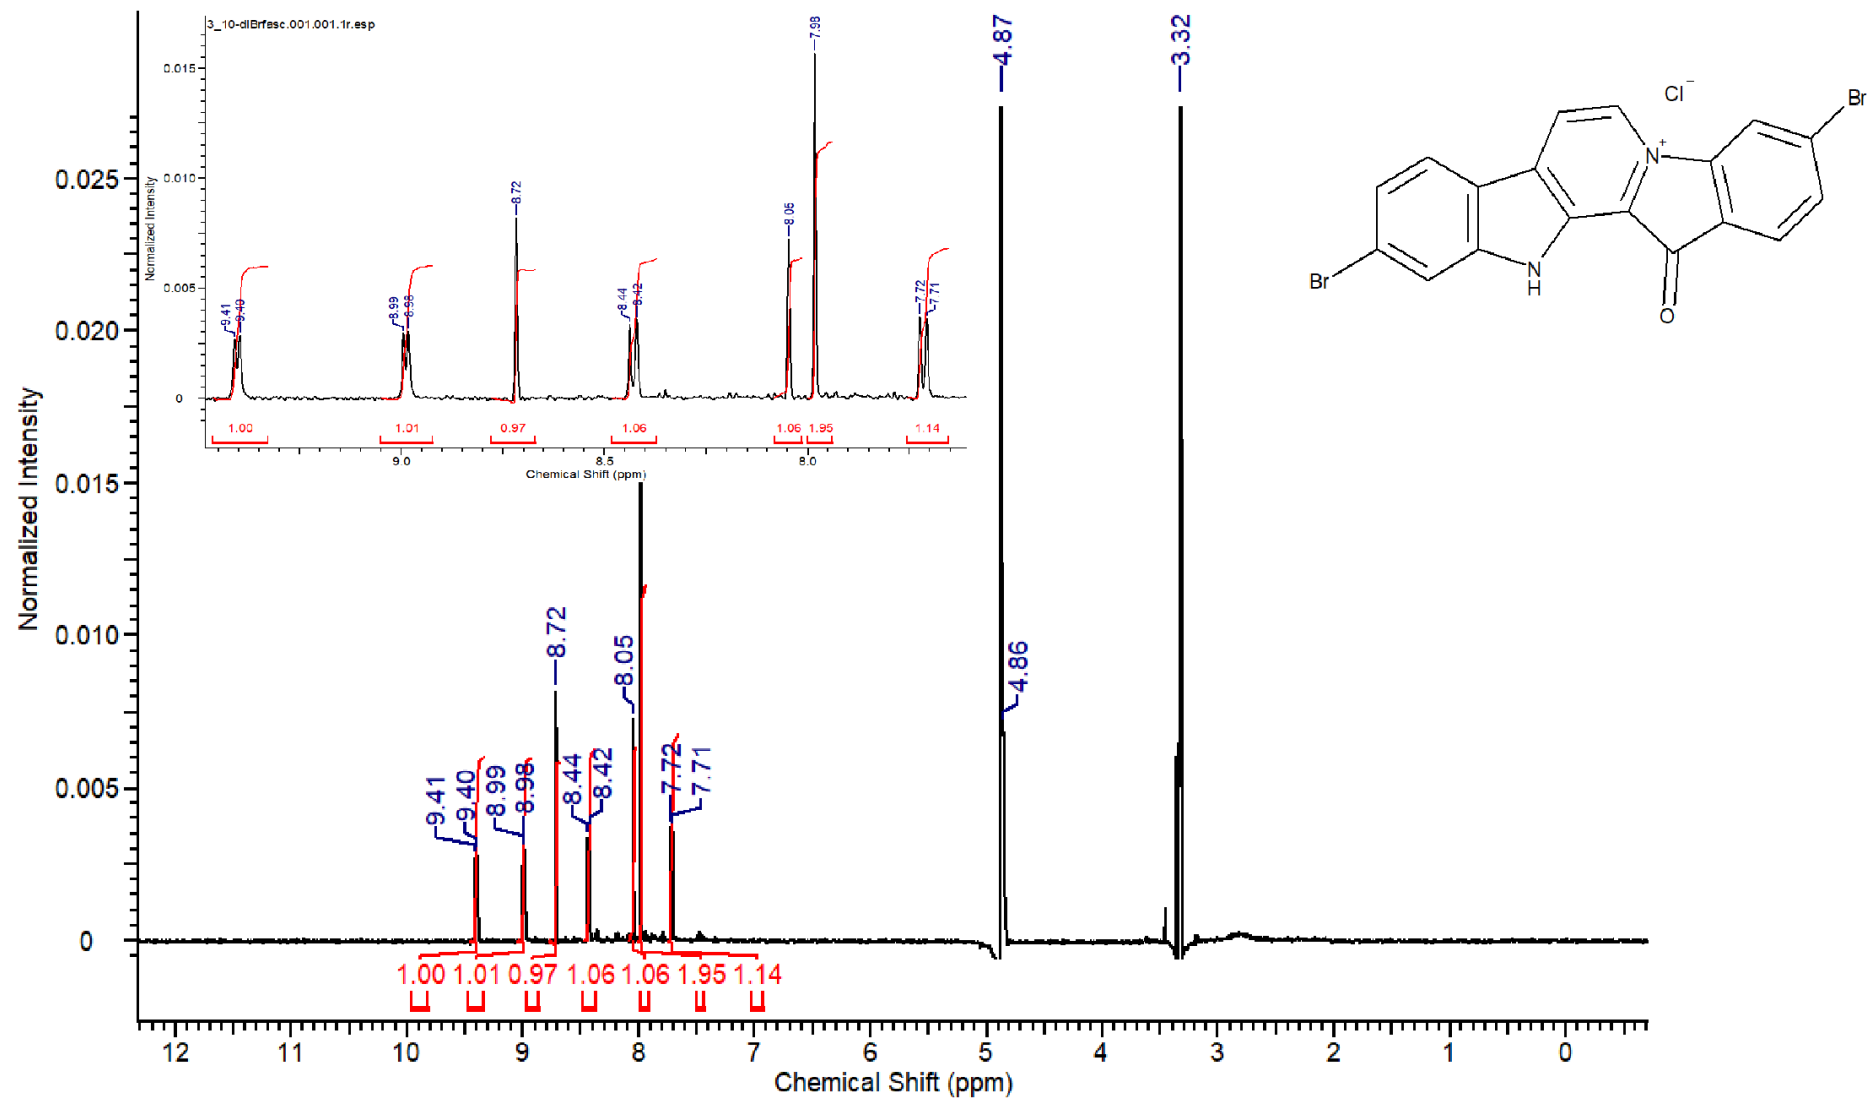

**Figure S3.**  $^1\text{H}$  NMR spectra of 3-bromofascaplysin (3BF)

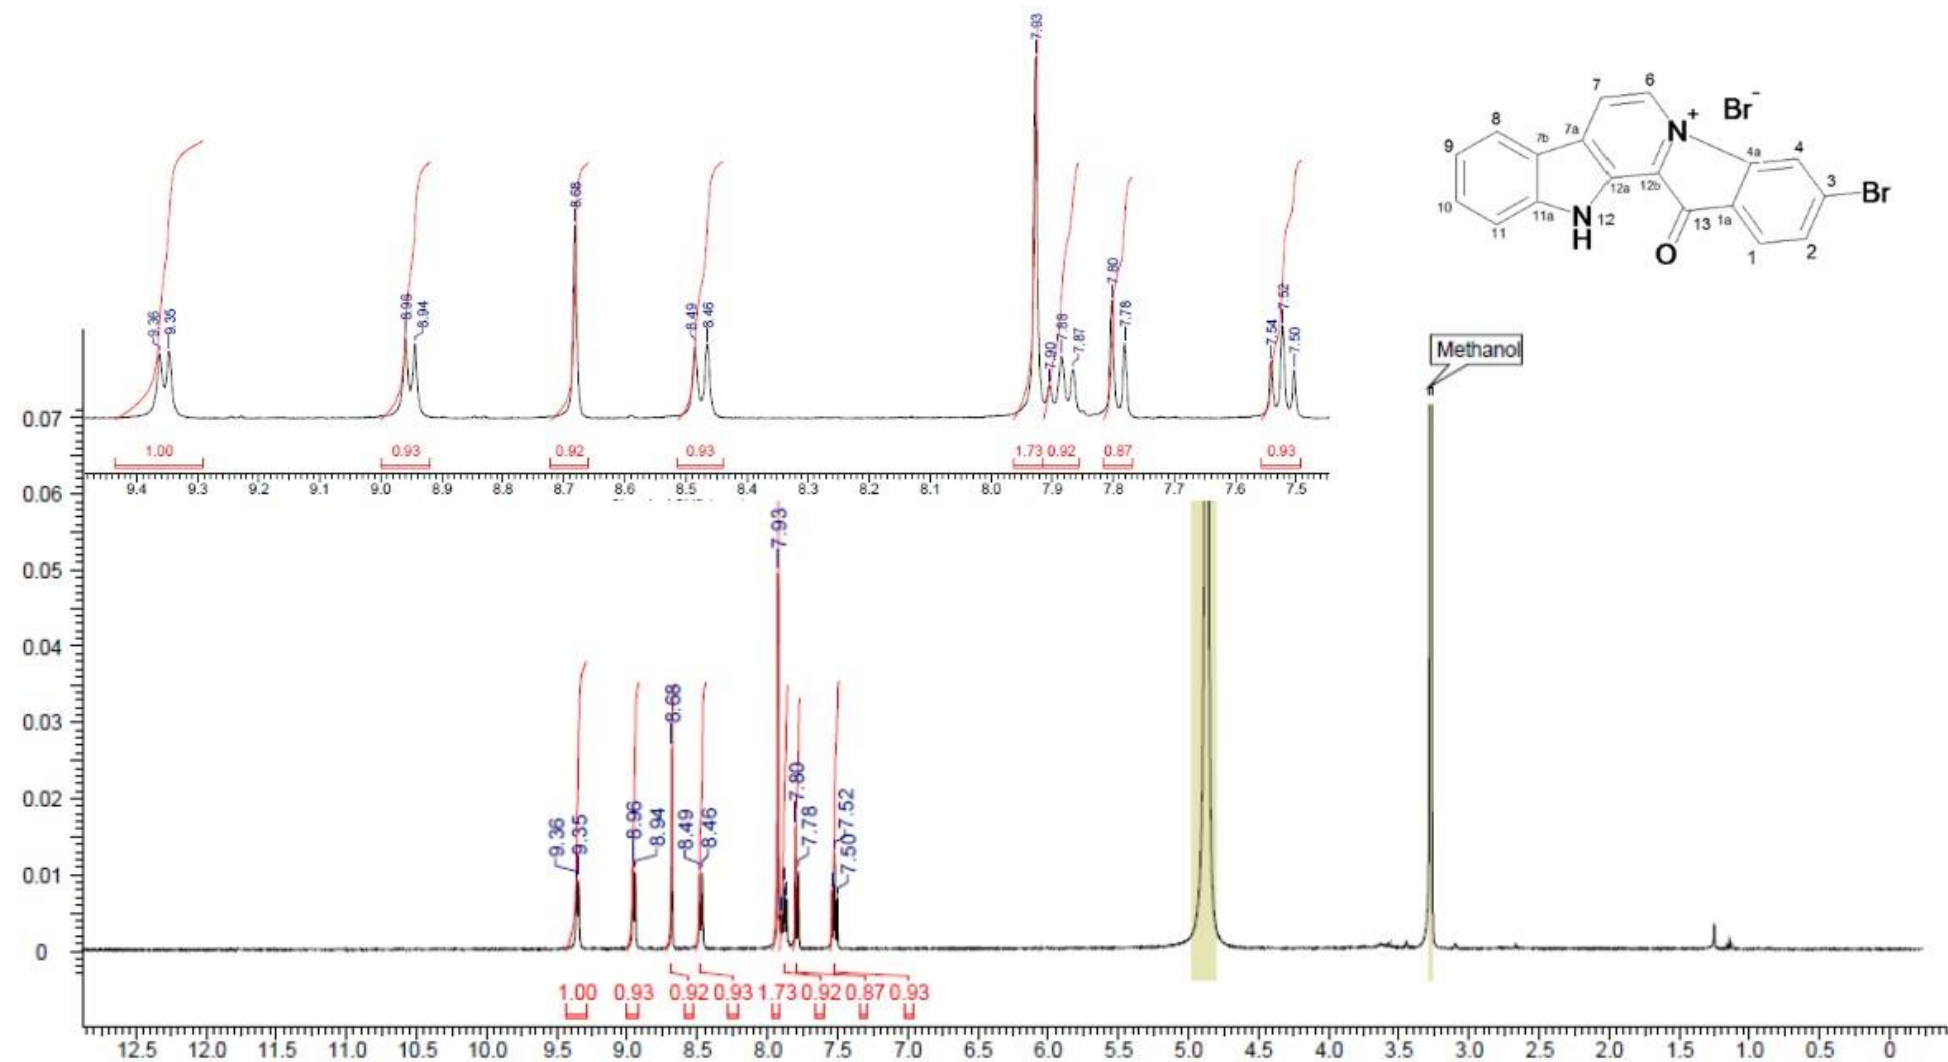

**Figure S4.**  $^1\text{H}$  NMR spectra of 2-bromofascaplysin (2BF)

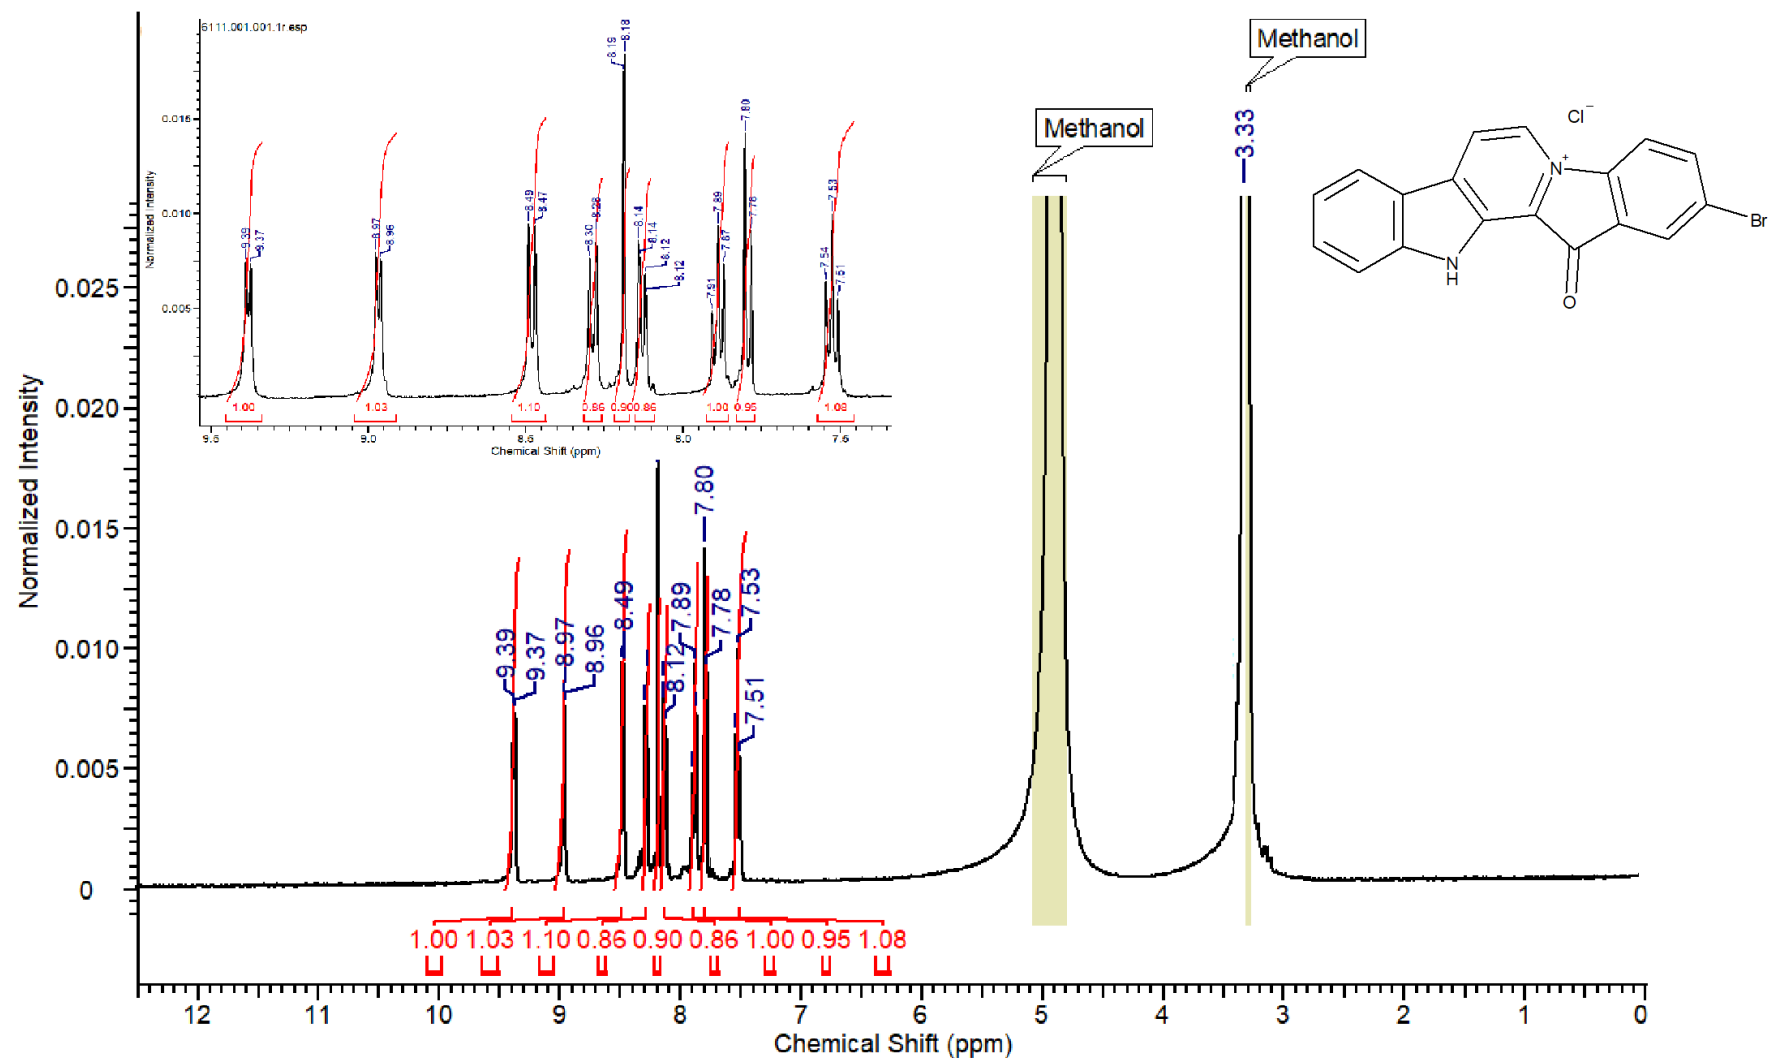

**Figure S5.**  $^1\text{H}$  NMR spectra of 10-bromofascaplysin (10BF)

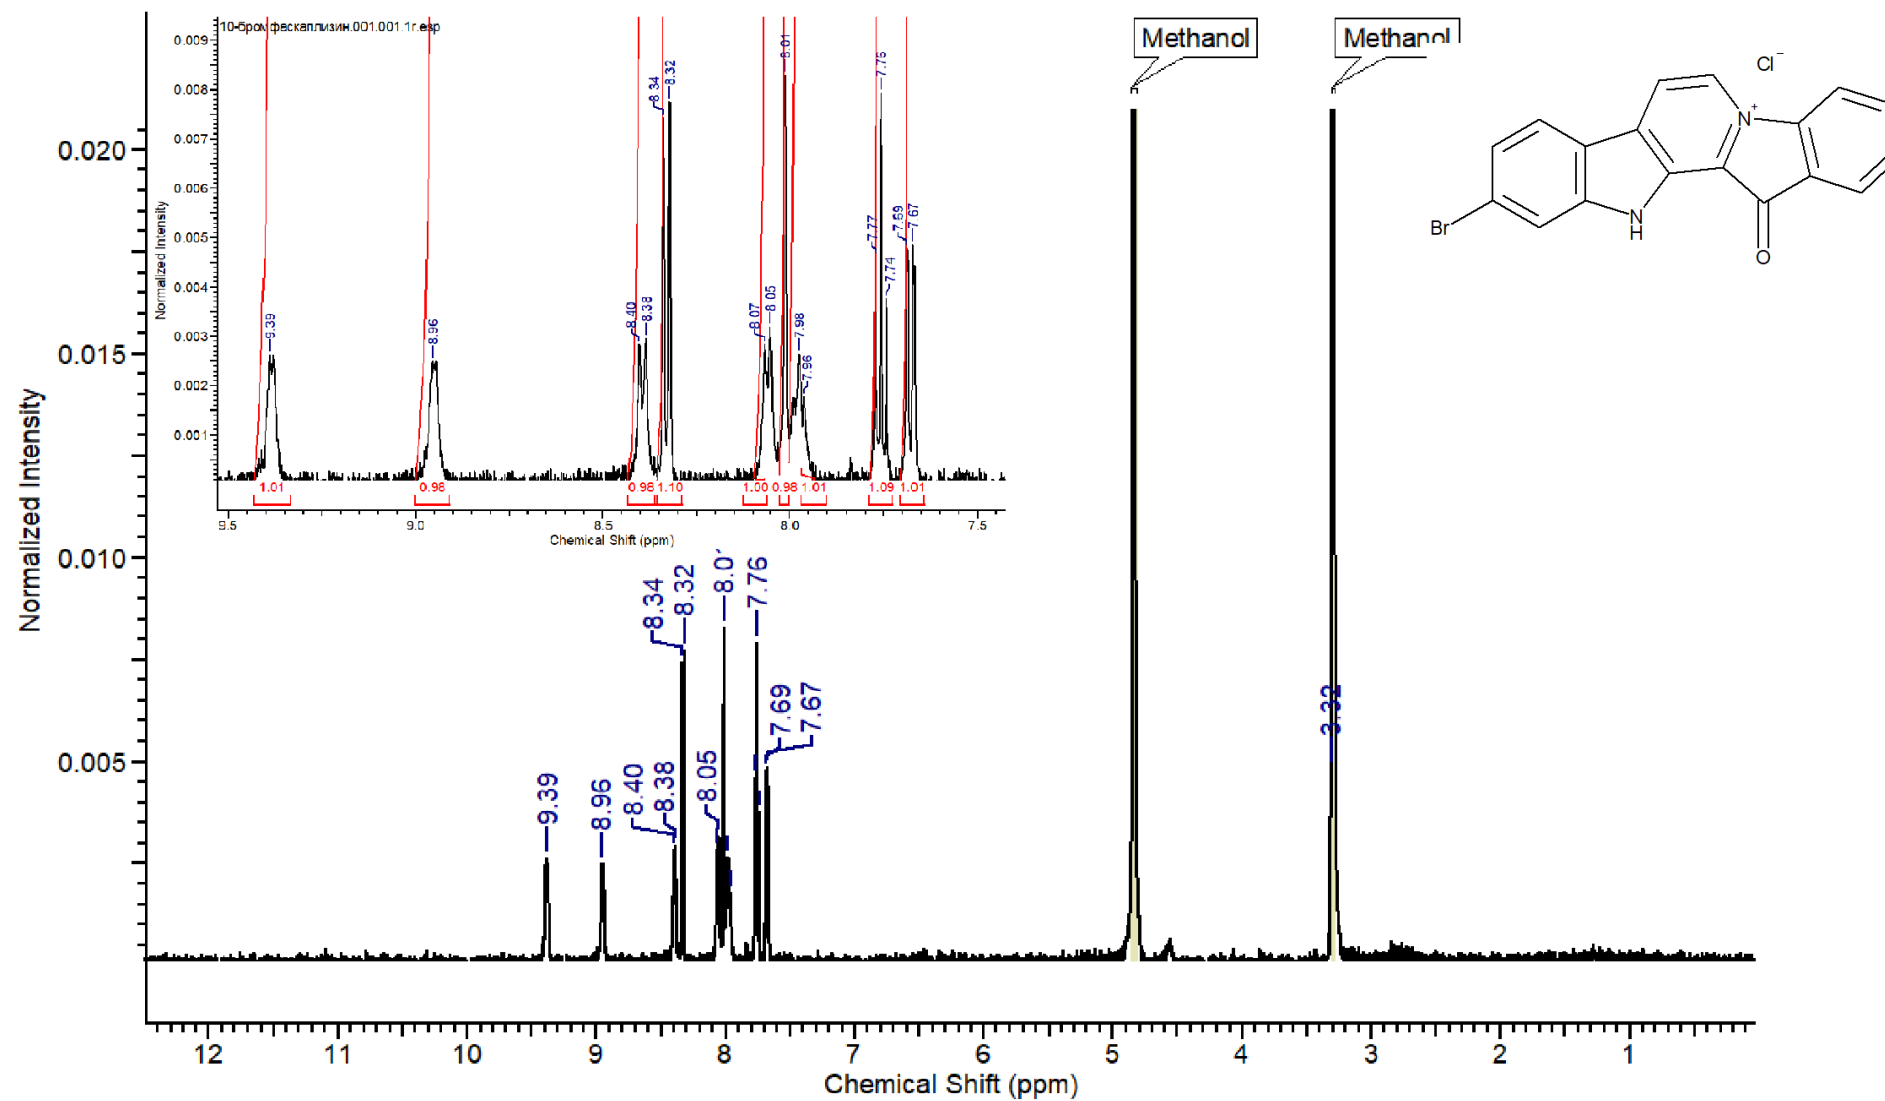

Supplement: s1 [file s1]
